# Supplementary material for: Integration of Phosphoproteomics and Transcriptome Studies Reveals ABA Signaling Pathways Regulate UV-B Tolerance in Rhododendron chrysanthum Leaves
Source: MDPI journal article supplement (doi:10.3390/genes14061153), 2023-05-25
Supplement: s1 [file s1]

Table S1. Differential phosphorylated protein table of *R. chrysanthum* under UV-B stress

| Protein accession                 | Position | Amino acid | Protein description                                                                        | KEGG Gene                                                              | P value         | Regulated Type |
|-----------------------------------|----------|------------|--------------------------------------------------------------------------------------------|------------------------------------------------------------------------|-----------------|----------------|
| Gene.11338_CL83<br>5.Contig6_All  | 184      | S          | RPM1-interacting<br>protein 4                                                              | RIN4; RPM1-<br>interacting<br>protein 4                                | 0.0069796       | Down           |
| Gene.11338_CL83<br>5.Contig6_All  | 86       | S          | RPM1-interacting<br>protein 4                                                              | RIN4; RPM1-<br>interacting<br>protein 4                                | 0.010177        | Down           |
| Gene.13985_CL11<br>05.Contig1_All | 109      | S          | "Plastid-lipid-<br>associated protein 6,<br>chloroplastic"                                 |                                                                        | 0.0023211       | Down           |
| Gene.13985_CL11<br>05.Contig1_All | 220      | S          | "Plastid-lipid-<br>associated protein 6,<br>chloroplastic"                                 |                                                                        | 0.041461        | Up             |
| Gene.14291_CL11<br>44.Contig3_All | 921      | T          | PREDICTED:<br>uncharacterized<br>protein<br>LOC100250143<br>isoform X1 [Vitis<br>vinifera] |                                                                        | 0.028078        | Down           |
| Gene.14602_CL11<br>80.Contig5_All | 11       | S          | 60S ribosomal<br>protein L6                                                                | RP-L6e; large<br>subunit<br>ribosomal<br>protein L6e                   | 0.0008157<br>5  | Down           |
| Gene.14686_CL11<br>91.Contig2_All | 320      | S          | ABC transporter C<br>family member 5                                                       |                                                                        | 0.032404        | Up             |
| Gene.15319_CL12<br>47.Contig1_All | 107      | T          | "Transketolase,<br>chloroplastic"                                                          | E2.2.1.1;<br>transketolase<br>[EC:2.2.1.1]                             | 0.0023804       | Up             |
| Gene.19346_CL17<br>03.Contig8_All | 154      | S          | Serine/threonine-<br>protein kinase<br>SAPK2                                               | SNRK2;<br>serine/threo<br>nine-protein<br>kinase SRK2<br>[EC:2.7.11.1] | 0.04842         | Up             |
| Gene.20539_CL18<br>24.Contig2_All | 135      | S          | "Sec-independent<br>protein translocase<br>protein TATA,<br>chloroplastic"                 | tatA; sec-<br>independent<br>protein<br>translocase<br>protein TatA    | 0.035424        | Up             |
| Gene.21159_CL19<br>03.Contig2_All | 178      | S          | "ATP synthase<br>subunit b',<br>chloroplastic"                                             | ATPF0B; F-<br>type H+-<br>transporting<br>ATPase<br>subunit b          | 0.0000627<br>84 | Up             |

|                 |     |   |                                                                                 |                                                              |           |      |
|-----------------|-----|---|---------------------------------------------------------------------------------|--------------------------------------------------------------|-----------|------|
| Gene.23080_CL21 | 356 | T | Protein BTR1                                                                    |                                                              | 0.0059976 | Down |
| 52.Contig1_All  |     |   |                                                                                 |                                                              |           |      |
| Gene.23829_CL22 | 60  | S | CSC1-like protein                                                               |                                                              | 0.035557  | Down |
| 26.Contig3_All  |     |   | HYP1                                                                            |                                                              |           |      |
| Gene.24603_CL23 | 725 | S | Nuclear pore complex protein NUP98A                                             | NUP98; nuclear pore complex protein Nup98-Nup96              | 0.023098  | Down |
| 33.Contig3_All  |     |   |                                                                                 |                                                              |           |      |
| Gene.26206_CL25 | 522 | S | Serine/threonine-protein kinase BLUS1                                           |                                                              | 0.029463  | Up   |
| 59.Contig3_All  |     |   |                                                                                 |                                                              |           |      |
| Gene.26206_CL25 | 491 | S | Serine/threonine-protein kinase BLUS1                                           |                                                              | 0.0137422 | Up   |
| 59.Contig3_All  |     |   |                                                                                 |                                                              |           |      |
| Gene.26950_CL26 | 398 | S | "Monodehydroascorbate reductase, chloroplastic/mitochondrial"                   | E1.6.5.4; monodehydroascorbate reductase (NADH) [EC:1.6.5.4] | 0.031282  | Down |
| 40.Contig3_All  |     |   |                                                                                 |                                                              |           |      |
| Gene.27331_CL27 | 77  | S | Chitin-binding lectin 1                                                         | EIF2B4; translation initiation factor eIF-2B subunit delta   | 0.044879  | Down |
| 04.Contig2_All  |     |   |                                                                                 |                                                              |           |      |
| Gene.28080_CL28 | 137 | S | PREDICTED: uncharacterized protein LOC105120307 isoform X2 [Populus euphratica] |                                                              | 0.04908   | Down |
| 24.Contig6_All  |     |   |                                                                                 |                                                              |           |      |
| Gene.28776_CL29 | 91  | T | Nucleoside diphosphate kinase 1                                                 | ndk; nucleoside-diphosphate kinase [EC:2.7.4.6]              | 0.0022381 | Up   |
| 33.Contig2_All  |     |   |                                                                                 |                                                              |           |      |
| Gene.29020_CL29 | 100 | S | Isocitrate dehydrogenase [NADP]                                                 | IDH1; isocitrate dehydrogenase [EC:1.1.1.42]                 | 0.0037984 | Down |
| 93.Contig9_All  |     |   |                                                                                 |                                                              |           |      |

|                 |     |   |                                                                          |                                             |           |      |
|-----------------|-----|---|--------------------------------------------------------------------------|---------------------------------------------|-----------|------|
| Gene.30247_CL31 | 3   | S | Nitrate regulatory gene2 protein                                         |                                             | 0.021555  | Down |
| 60.Contig4_All  |     |   |                                                                          |                                             |           |      |
| Gene.31339_CL33 | 369 | T | Monosaccharide-sensing protein 2                                         |                                             | 0.0044396 | Up   |
| 46.Contig6_All  |     |   |                                                                          |                                             |           |      |
| Gene.31339_CL33 | 419 | S | Monosaccharide-sensing protein 2                                         |                                             | 0.0120847 | Up   |
| 46.Contig6_All  |     |   |                                                                          |                                             |           |      |
| Gene.32668_CL35 | 107 | T | "PGR5-like protein 1B, chloroplastic"                                    |                                             | 0.0008845 | Down |
| 93.Contig4_All  |     |   |                                                                          |                                             |           |      |
| Gene.33054_CL36 | 422 | T | ABSCISIC ACID-INSENSITIVE 5-like protein 5                               | ABF; ABA responsive element binding factor  | 0.0020837 | Up   |
| 61.Contig1_All  |     |   |                                                                          |                                             |           |      |
| Gene.34110_CL38 | 250 | S | MAP3K epsilon protein kinase 1                                           |                                             | 0.0040816 | Up   |
| 30.Contig1_All  |     |   |                                                                          |                                             |           |      |
| Gene.34124_CL38 | 95  | T | "RuBisCO large subunit-binding protein subunit alpha, chloroplastic"     |                                             | 0.0046957 | Up   |
| 32.Contig4_All  |     |   |                                                                          |                                             |           |      |
| Gene.34496_CL38 | 240 | S | Auxin efflux carrier component 7                                         |                                             | 0.0054587 | Up   |
| 92.Contig8_All  |     |   |                                                                          |                                             |           |      |
| Gene.34715_CL39 | 387 | S | 60S acidic ribosomal protein P0                                          | RP-LP0; large subunit ribosomal protein LP0 | 0.022636  | Down |
| 46.Contig2_All  |     |   |                                                                          |                                             |           |      |
| Gene.3570_CL223 | 10  | S | PREDICTED: conserved oligomeric Golgi complex subunit 1 [Vitis vinifera] |                                             | 0.0007611 | Down |
| .Contig5_All    |     |   |                                                                          |                                             | 7         |      |
| Gene.36597_CL43 | 88  | S | "Phosphoglycerate kinase, chloroplastic"                                 | PGK; phosphoglycerate kinase [EC:2.7.2.3]   | 0.0000835 | Up   |
| 35.Contig4_All  |     |   |                                                                          |                                             | 25        |      |
| Gene.36597_CL43 | 86  | T | "Phosphoglycerate kinase, chloroplastic"                                 | PGK; phosphoglycerate kinase [EC:2.7.2.3]   | 0.0032231 | Up   |
| 35.Contig4_All  |     |   |                                                                          |                                             |           |      |
| Gene.36604_CL43 | 409 | S | Protein SRC2                                                             |                                             | 0.0062008 | Up   |
| 38.Contig2_All  |     |   |                                                                          |                                             |           |      |
| Gene.37414_CL44 | 77  | S | "Ferritin-1, chloroplastic"                                              |                                             | 0.0096954 | Up   |
| 89.Contig4_All  |     |   |                                                                          |                                             |           |      |
| Gene.38423_CL47 | 214 | S | "Endo-1,3;1,4-beta-D-glucanase"                                          |                                             | 0.003559  | Up   |
| 05.Contig5_All  |     |   |                                                                          |                                             |           |      |

|                                   |      |   |                                                                       |                                                                                                                |                |      |
|-----------------------------------|------|---|-----------------------------------------------------------------------|----------------------------------------------------------------------------------------------------------------|----------------|------|
| Gene.38510_CL47<br>26.Contig1_All | 93   | S | Tobamovirus<br>multiplication<br>protein 2A                           |                                                                                                                | 0.0040639      | Down |
| Gene.3887_CL243<br>.Contig4_All   | 439  | S | "Glyceraldehyde-3-<br>phosphate<br>dehydrogenase B,<br>chloroplastic" | GAPA;<br>glyceraldehyd<br>e-3-phosphate<br>dehydrogenas<br>e (NADP+)<br>(phosphorylat<br>ing)<br>[EC:1.2.1.13] | 0.0058047      | Up   |
| Gene.3887_CL243<br>.Contig4_All   | 144  | S | "Glyceraldehyde-3-<br>phosphate<br>dehydrogenase B,<br>chloroplastic" | GAPA;<br>glyceraldehyd<br>e-3-phosphate<br>dehydrogenas<br>e (NADP+)<br>(phosphorylat<br>ing)<br>[EC:1.2.1.13] | 0.0019579<br>5 | Up   |
| Gene.38972_CL48<br>27.Contig1_All | 60   | S | "Fructose-<br>bisphosphate<br>aldolase 2,<br>chloroplastic"           | ALDO;<br>fructose-<br>bisphosphate<br>aldolase, class<br>I<br>[EC:4.1.2.13]                                    | 0.0003201<br>4 | Down |
| Gene.38985_CL48<br>29.Contig2_All | 221  | S | "Gamma carbonic<br>anhydrase 1,<br>mitochondrial"                     |                                                                                                                | 0.025757       | Down |
| Gene.39709_CL50<br>12.Contig3_All | 41   | S | Polyadenylation and<br>cleavage factor<br>homolog 1                   | PCF11; pre-<br>mRNA<br>cleavage<br>complex 2<br>protein Pcf11                                                  | 0.004624       | Down |
| Gene.40269_CL51<br>29.Contig3_All | 181  | T | "20 kDa chaperonin,<br>chloroplastic"                                 |                                                                                                                | 0.010884       | Up   |
| Gene.40497_CL51<br>73.Contig2_All | 78   | S | Phosphoprotein<br>ECPP44                                              |                                                                                                                | 0.04812        | Down |
| Gene.4136_CL252<br>.Contig3_All   | 649  | S | "Glucose-6-<br>phosphate isomerase<br>1, chloroplastic"               | GPI; glucose-<br>6-phosphate<br>isomerase<br>[EC:5.3.1.9]                                                      | 0.0159407      | Down |
| Gene.42653_CL56<br>97.Contig2_All | 1408 | S | Protein transport<br>protein SEC16B<br>homolog                        |                                                                                                                | 0.0109043      | Down |

|                 |     |   |                                                                     |                                                                |           |      |
|-----------------|-----|---|---------------------------------------------------------------------|----------------------------------------------------------------|-----------|------|
| Gene.43342_CL58 | 146 | S | "Peroxisome Q, chloroplast"                                         |                                                                | 0.0003378 | Up   |
| 54.Contig2_All  |     |   |                                                                     |                                                                | 7         |      |
| Gene.43600_CL59 | 36  | S | MLP-like protein                                                    |                                                                | 0.0000587 | Down |
| 31.Contig3_All  |     |   |                                                                     |                                                                | 16        |      |
| Gene.44435_CL61 | 47  | T | "Phosphoribulokinase, chloroplast"                                  | PRK;                                                           | 0.003202  | Down |
| 25.Contig3_All  |     |   |                                                                     | phosphoribulokinase [EC:2.7.1.19]                              |           |      |
| Gene.45512_CL64 | 519 | T | Leucine-rich repeat extensin-like protein 3                         | ACIN1; apoptotic chromatin condensation inducer in the nucleus | 0.0029379 | Up   |
| 07.Contig3_All  |     |   |                                                                     |                                                                |           |      |
| Gene.45512_CL64 | 556 | S | Leucine-rich repeat extensin-like protein 3                         | ACIN1; apoptotic chromatin condensation inducer in the nucleus | 0.0000372 | Down |
| 07.Contig3_All  |     |   |                                                                     |                                                                | 21        |      |
| Gene.45512_CL64 | 526 | S | Leucine-rich repeat extensin-like protein 3                         | ACIN1; apoptotic chromatin condensation inducer in the nucleus | 0.0000358 | Up   |
| 07.Contig3_All  |     |   |                                                                     |                                                                | 16        |      |
| Gene.46142_CL65 | 165 | S | "1,4-alpha-glucan-branching enzyme 2-2, chloroplast/amyloplastic"   | GBE1; 1,4-alpha-glucan branching enzyme [EC:2.4.1.18]          | 0.0004442 | Down |
| 69.Contig6_All  |     |   |                                                                     |                                                                | 1         |      |
| Gene.46959_CL67 | 168 | T | RPM1-interacting protein 4                                          | RIN4; RPM1-interacting protein 4                               | 0.0174989 | Up   |
| 76.Contig1_All  |     |   |                                                                     |                                                                |           |      |
| Gene.46959_CL67 | 163 | T | RPM1-interacting protein 4                                          | RIN4; RPM1-interacting protein 4                               | 0.04094   | Up   |
| 76.Contig1_All  |     |   |                                                                     |                                                                |           |      |
| Gene.47171_CL68 | 265 | S | hypothetical protein Ccrd_008086 [Cynara cardunculus var. scolymus] | BABAM; BRISC and BRCA1-A complex member 1                      | 0.0025644 | Down |
| 21.Contig2_All  |     |   |                                                                     |                                                                |           |      |

|                                    |     |   |                                                                                                       |                                                                                |                        |
|------------------------------------|-----|---|-------------------------------------------------------------------------------------------------------|--------------------------------------------------------------------------------|------------------------|
| Gene.47456_CL68<br>76.Contig2_All  | 454 | S | Protein phosphatase<br>2C and cyclic<br>nucleotide-<br>binding/kinase<br>domain-containing<br>protein | 0.011857                                                                       | Down                   |
| Gene.48804_CL71<br>47.Contig2_All  | 328 | S | Eukaryotic<br>translation initiation<br>factor 4B1                                                    | 0.0000201<br>88                                                                | Down                   |
| Gene.49846_CL73<br>99.Contig2_All  | 58  | S | SUN domain-<br>containing protein 1                                                                   | 0.018705                                                                       | Down                   |
| Gene.49846_CL73<br>99.Contig2_All  | 48  | S | SUN domain-<br>containing protein 1                                                                   | 0.021356                                                                       | Down                   |
| Gene.51486_CL77<br>52.Contig8_All  | 64  | S | "Photosystem II 10<br>kDa polypeptide,<br>chloroplastic"                                              | psbR;<br>photosystem<br>II 10kDa<br>protein                                    | 0.0044599<br>Down      |
| Gene.52037_CL78<br>39.Contig2_All  | 26  | S | Annexin D4                                                                                            | 0.0082023                                                                      | Down                   |
| Gene.53321_CL80<br>52.Contig1_All  | 271 | T | Heat shock cognate<br>70 kDa protein 2                                                                | HSPA1s; heat<br>shock 70kDa<br>protein<br>1/2/6/8                              | 0.0018776<br>8<br>Down |
| Gene.55228_CL82<br>12.Contig5_All  | 3   | S | V-type proton<br>ATPase catalytic<br>subunit A                                                        | ATPeV1A; V-<br>type H+-<br>transporting<br>ATPase<br>subunit A<br>[EC:7.1.2.2] | 0.0052807<br>Down      |
| Gene.56696_CL83<br>37.Contig10_All | 392 | S | "Chaperonin 60<br>subunit beta 2,<br>chloroplastic"                                                   | groEL;<br>chaperonin<br>GroEL                                                  | 0.031479<br>Up         |
| Gene.57775_Unig<br>ene284_All      | 96  | S | Probable calcium-<br>binding protein<br>CML18                                                         | CALM;<br>calmodulin                                                            | 0.039236<br>Down       |
| Gene.58581_Unig<br>ene831_All      | 67  | S | Metacaspase-4                                                                                         | 0.0003616<br>6                                                                 | Down                   |
| Gene.58589_Unig<br>ene835_All      | 783 | S | EH domain-<br>containing protein 2                                                                    | 0.027299                                                                       | Down                   |
| Gene.64089_Unig<br>ene5111_All     | 236 | S | Uncharacterized<br>protein Atlg03900                                                                  | 0.0032601                                                                      | Down                   |
| Gene.65018_Unig<br>ene5787_All     | 524 | S | GBF-interacting<br>protein 1                                                                          | 0.0108382                                                                      | Up                     |

|                                 |     |   |                                                                    |    |                                                                                      |                 |      |
|---------------------------------|-----|---|--------------------------------------------------------------------|----|--------------------------------------------------------------------------------------|-----------------|------|
| Gene.65697_Unig<br>ene6211_All  | 232 | S | Photosystem<br>protein D1                                          | II | psbA;<br>photosystem<br>II P680<br>reaction<br>center D1<br>protein<br>[EC:1.10.3.9] | 0.0000245<br>07 | Up   |
| Gene.66649_Unig<br>ene6892_All  | 237 | S | "RNA pseudouridine<br>synthase 6,<br>chloroplastic"                |    |                                                                                      | 0.0090224       | Down |
| Gene.68254_Unig<br>ene8007_All  | 178 | S | Protein BONZAI 1                                                   |    |                                                                                      | 0.0006399<br>9  | Down |
| Gene.6848_CL464<br>.Contig2_All | 6   | S | Probable aquaporin<br>PIP2-8                                       |    |                                                                                      | 0.0011981<br>8  | Down |
| Gene.6848_CL464<br>.Contig2_All | 282 | T | Probable aquaporin<br>PIP2-8                                       |    |                                                                                      | 0.0116366       | Down |
| Gene.69502_Unig<br>ene8888_All  | 119 | S | 187-kDa<br>microtubule-<br>associated protein<br>AIR9              |    |                                                                                      | 0.032743        | Down |
| Gene.70938_Unig<br>ene9872_All  | 291 | S | "Membrane-<br>associated 30 kDa<br>protein,<br>chloroplastic"      |    |                                                                                      | 0.0041569       | Down |
| Gene.71075_Unig<br>ene9967_All  | 51  | S | "Linoleate 13S-<br>lipoxygenase 2-1,<br>chloroplastic"             |    | LOX2S;<br>lipoxygenase<br>[EC:1.13.11.1<br>2]                                        | 0.0000784<br>86 | Down |
| Gene.71128_Unig<br>ene9997_All  | 206 | S | Acyl-CoA-binding<br>domain-containing<br>protein 1                 |    |                                                                                      | 0.0051022       | Down |
| Gene.71430_Unig<br>ene10207_All | 534 | S | Dynamin-2B                                                         |    | DNM;<br>dynamin<br>GTPase<br>[EC:3.6.5.5]                                            | 0.0000984<br>55 | Down |
| Gene.71430_Unig<br>ene10207_All | 881 | S | Dynamin-2B                                                         |    | DNM;<br>dynamin<br>GTPase<br>[EC:3.6.5.5]                                            | 0.012035        | Down |
| Gene.71879_Unig<br>ene10600_All | 190 | S | uncharacterized<br>protein<br>LOC107468142<br>[Arachis duranensis] |    |                                                                                      | 0.028077        | Up   |

|                                 |     |   |                                                                            |                                                            |                        |
|---------------------------------|-----|---|----------------------------------------------------------------------------|------------------------------------------------------------|------------------------|
| Gene.72388_Unig<br>ene11314_All | 155 | S | hypothetical protein<br>[Camellia sinensis]                                | 0.0010840<br>9                                             | Down                   |
| Gene.72474_Unig<br>ene11360_All | 95  | S | Mitochondrial outer<br>membrane protein<br>porin of 34 kDa                 | 0.0011355<br>7                                             | Down                   |
| Gene.72804_Unig<br>ene11573_All | 131 | S | hypothetical protein<br>VITISV_016468<br>[Vitis vinifera]                  | 0.0049434                                                  | Down                   |
| Gene.73161_Unig<br>ene11817_All | 157 | S | Methyl-CpG-<br>binding domain-<br>containing protein<br>13                 | 0.0075173                                                  | Down                   |
| Gene.73161_Unig<br>ene11817_All | 167 | S | Methyl-CpG-<br>binding domain-<br>containing protein<br>13                 | 0.039717                                                   | Down                   |
| Gene.73460_Unig<br>ene12021_All | 60  | S | "Peroxisome-2F,<br>mitochondrial"                                          | 0.047801                                                   | Up                     |
| Gene.73584_Unig<br>ene12104_All | 149 | T | Exocyst complex<br>component<br>EXO70B2                                    | 0.0038577                                                  | Up                     |
| Gene.73621_Unig<br>ene12126_All | 266 | S | "Oxygen-dependent<br>coproporphyrinogen<br>-III oxidase,<br>chloroplastic" | CPOX;<br>coproporphyrinogen III<br>oxidase<br>[EC:1.3.3.3] | 0.0070391<br>Up        |
| Gene.73685_Unig<br>ene12173_All | 18  | S | Stem-specific<br>protein TSJT1                                             | 0.0006210<br>1                                             | Up                     |
| Gene.75286_Unig<br>ene13818_All | 171 | S | "50S ribosomal<br>protein L29,<br>chloroplastic"                           | RP-L29; large<br>subunit<br>ribosomal<br>protein L29       | 0.0017037<br>9<br>Down |
| Gene.75292_Unig<br>ene13824_All | 56  | S | Reticulon-like<br>protein B4                                               | 0.035724                                                   | Up                     |
| Gene.7572_CL536<br>.Contig1_All | 44  | S | 18.2 kDa class I heat<br>shock protein                                     | HSP20;<br>HSP20 family<br>protein                          | 0.0051778<br>Down      |
| Gene.7619_CL543<br>.Contig2_All | 217 | S | Glycine-rich protein<br>2                                                  | 0.0016031<br>2                                             | Down                   |



|                                 |     |   |                                                                                    |                                                                                  |                 |      |
|---------------------------------|-----|---|------------------------------------------------------------------------------------|----------------------------------------------------------------------------------|-----------------|------|
| Gene.76858_Unig<br>ene15319_All | 164 | S | Probable ADP-<br>ribosylation factor<br>GTPase-activating<br>protein AGD6          | ARFGAP1;<br>ADP-<br>ribosylation<br>factor<br>GTPase-<br>activating<br>protein 1 | 0.011138        | Down |
| Gene.77037_Unig<br>ene15420_All | 466 | S | PREDICTED:<br>putative G3BP-like<br>protein isoform X1<br>[Nicotiana attenuata]    |                                                                                  | 0.022538        | Down |
| Gene.77355_Unig<br>ene15616_All | 240 | S | 40S ribosomal<br>protein S6                                                        | RP-S6e; small<br>subunit<br>ribosomal<br>protein S6e                             | 0.0008411<br>1  | Up   |
| Gene.77538_Unig<br>ene15752_All | 257 | S | Pyruvate<br>decarboxylase 1                                                        | PDC;<br>pyruvate<br>decarboxylase<br>[EC:4.1.1.1]                                | 0.0001636<br>49 | Down |
| Gene.79431_Unig<br>ene17536_All | 43  | S | protein SSUH2<br>homolog [Manihot<br>esculenta]                                    |                                                                                  | 0.0151808       | Up   |
| Gene.7986_CL578<br>.Contig2_All | 81  | S | "Photosystem II 10<br>kDa polypeptide,<br>chloroplastic"                           | psbR;<br>photosystem<br>II 10kDa<br>protein                                      | 1.76886E-<br>05 | Down |
| Gene.7986_CL578<br>.Contig2_All | 73  | S | "Photosystem II 10<br>kDa polypeptide,<br>chloroplastic"                           | psbR;<br>photosystem<br>II 10kDa<br>protein                                      | 0.0049196       | Down |
| Gene.80537_Unig<br>ene18753_All | 549 | S | Flowering time<br>control protein FPA                                              |                                                                                  | 0.033263        | Down |
| Gene.80865_Unig<br>ene18952_All | 519 | T | Kinesin-like protein<br>KIN-14B                                                    |                                                                                  | 0.0000604<br>18 | Up   |
| Gene.80865_Unig<br>ene18952_All | 660 | S | Kinesin-like protein<br>KIN-14B                                                    |                                                                                  | 0.010517        | Down |
| Gene.81168_Unig<br>ene19137_All | 29  | S | PREDICTED:<br>uncharacterized<br>protein<br>LOC102598108<br>[Solanum<br>tuberosum] | HSPBP1;<br>hsp70-<br>interacting<br>protein                                      | 0.0022984       | Down |

|                                 |     |   |                                                                    |                                                                                |                 |      |
|---------------------------------|-----|---|--------------------------------------------------------------------|--------------------------------------------------------------------------------|-----------------|------|
| Gene.81465_Unig<br>ene19343_All | 330 | S | Proline-rich<br>receptor-like protein<br>kinase PERK2              |                                                                                | 0.0091392       | Down |
| Gene.81465_Unig<br>ene19343_All | 105 | T | Proline-rich<br>receptor-like protein<br>kinase PERK2              |                                                                                | 0.002197        | Down |
| Gene.81522_Unig<br>ene19369_All | 80  | T | Leucine-rich repeat<br>extensin-like protein<br>3                  |                                                                                | 0.0003439<br>4  | Down |
| Gene.81531_Unig<br>ene19376_All | 621 | S | Eukaryotic<br>translation initiation<br>factor isoform 4G-2        | EIF4G;<br>translation<br>initiation<br>factor 4G                               | 0.0004407<br>7  | Down |
| Gene.81531_Unig<br>ene19376_All | 61  | S | Eukaryotic<br>translation initiation<br>factor isoform 4G-2        | EIF4G;<br>translation<br>initiation<br>factor 4G                               | 0.0000353<br>94 | Down |
| Gene.81531_Unig<br>ene19376_All | 184 | S | Eukaryotic<br>translation initiation<br>factor isoform 4G-2        | EIF4G;<br>translation<br>initiation<br>factor 4G                               | 0.0013391<br>7  | Down |
| Gene.81544_Unig<br>ene19383_All | 55  | S | "Fructose-<br>bisphosphate<br>aldolase<br>cytosolic"               | 6, ALDO;<br>fructose-<br>bisphosphate<br>aldolase, class<br>I<br>[EC:4.1.2.13] | 0.0084593       | Up   |
| Gene.82839_Unig<br>ene20755_All | 608 | S | Heat shock 70 kDa<br>protein 16                                    |                                                                                | 0.0002796<br>9  | Down |
| Gene.83286_Unig<br>ene21046_All | 51  | T | hypothetical protein<br>TSUD_229720<br>[Trifolium<br>subterraneum] |                                                                                | 0.0008192<br>4  | Down |
| Gene.83366_Unig<br>ene21103_All | 951 | S | "Histidine--tRNA<br>ligase, cytoplasmic"                           | HARS;<br>histidyl-tRNA<br>synthetase<br>[EC:6.1.1.21]                          | 0.0028558       | Down |
| Gene.85388_Unig<br>ene22921_All | 159 | S | 2-methylene-furan-<br>3-one reductase                              |                                                                                | 1.68112E-<br>05 | Up   |
| Gene.85395_Unig<br>ene22926_All | 63  | S | "Protein<br>CURVATURE<br>THYLAKOID 1A,<br>chloroplastic"           |                                                                                | 0.0050235       | Down |

|                                  |      |   |                                                             |                                                                                              |                   |
|----------------------------------|------|---|-------------------------------------------------------------|----------------------------------------------------------------------------------------------|-------------------|
| Gene.85450_Unig<br>ene22951_All  | 33   | S | Probable<br>serine/threonine-<br>protein kinase SIS8        | 0.027439                                                                                     | Down              |
| Gene.85450_Unig<br>ene22951_All  | 1159 | T | Probable<br>serine/threonine-<br>protein kinase SIS8        | 0.0020803                                                                                    | Down              |
| Gene.85630_Unig<br>ene23100_All  | 152  | S | Cold shock protein 2                                        | 0.0051199                                                                                    | Down              |
| Gene.86177_Unig<br>ene24148_All  | 140  | S | Formin-like protein<br>14                                   | 0.0148779                                                                                    | Down              |
| Gene.87528_Unig<br>ene32298_All  | 37   | T | "Chlorophyll a-b<br>binding protein<br>CP26, chloroplastic" | LHCB5;<br>light-<br>harvesting<br>complex II<br>chlorophyll<br>a/b binding<br>protein 5<br>1 | 0.0004351<br>Down |
| Gene.8795_CL667<br>.Contig11_All | 203  | T | Protein NTM1-like 9                                         | 0.032002                                                                                     | Down              |
| Gene.8795_CL667<br>.Contig11_All | 510  | T | Protein NTM1-like 9                                         | 0.038898                                                                                     | Down              |
| Gene.8795_CL667<br>.Contig11_All | 14   | S | Protein NTM1-like 9                                         | 0.024445                                                                                     | Down              |
| Gene.9131_CL681<br>.Contig8_All  | 68   | S | Uncharacterized<br>membrane protein<br>Atlg16860            | 0.0103017                                                                                    | Down              |
| Gene.9131_CL681<br>.Contig8_All  | 72   | S | Uncharacterized<br>membrane protein<br>Atlg16860            | KEGG Gene<br>6<br>0.0015018                                                                  | Down              |
